# Supplementary material
Source: MDPI journal article supplement (https://www.mdpi.com/2673-9976/12/1/9)

## INTRODUCTION

Non-alcoholic fatty liver disease (NAFLD) is a disease characterized by the excessive accumulation of lipids in the liver parenchyma, which can progress from simple steatosis to non-alcoholic steatohepatitis (NASH), and finally to cirrhosis and liver carcinoma [1]. To date, there is no effective pharmacological treatment against NAFLD; however, lifestyle modifications, including physical activity and the adoption of healthy eating habits, are therapeutic approaches against this disease [2,3]. The aim of this study was to evaluate the relationship between the improvement of the Intrahepatic Fat Content (IFC) in patients with NAFLD and metabolic syndrome and biomarkers of oxidative stress and inflammation after 6 months of lifestyle intervention.

## EXPERIMENTAL PROCEDURE

Patients diagnosed with NAFLD (n=60 adults; 40-60 years old) living in the Balearic Islands, Spain were classified in tertiles attending the improvement of IFC measured by Magnetic Resonance Imaging (MRI). Pro/antioxidant and inflammatory biomarkers were determined in plasma of these patients before and after the lifestyle intervention.

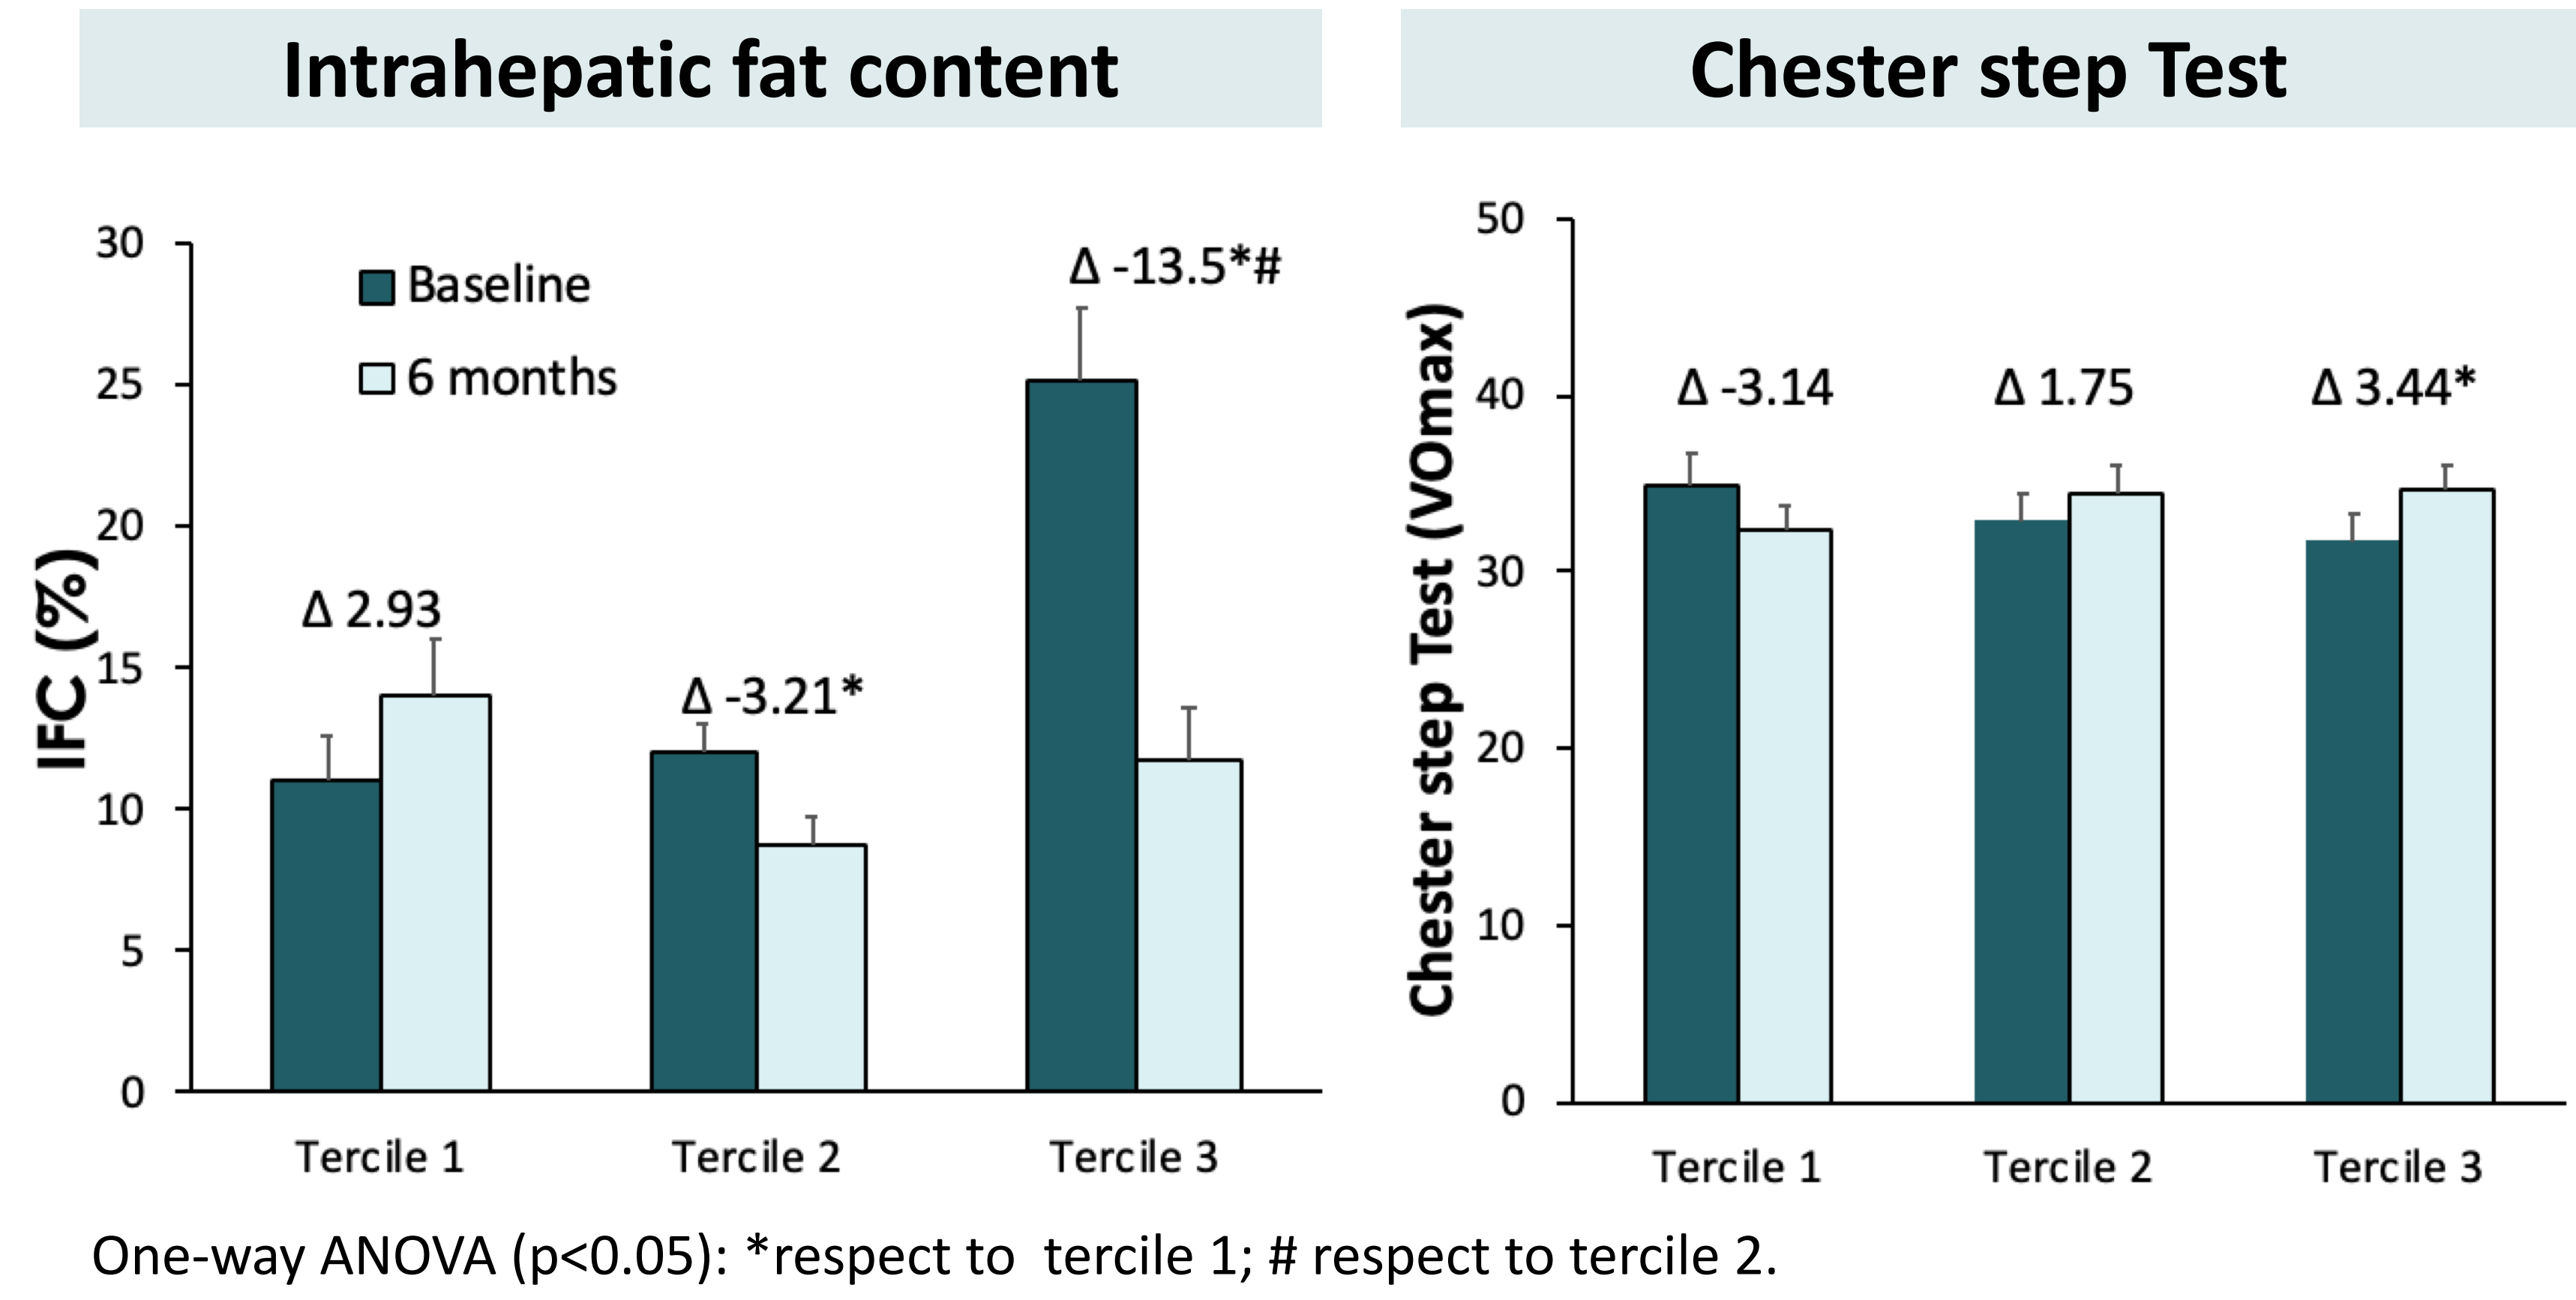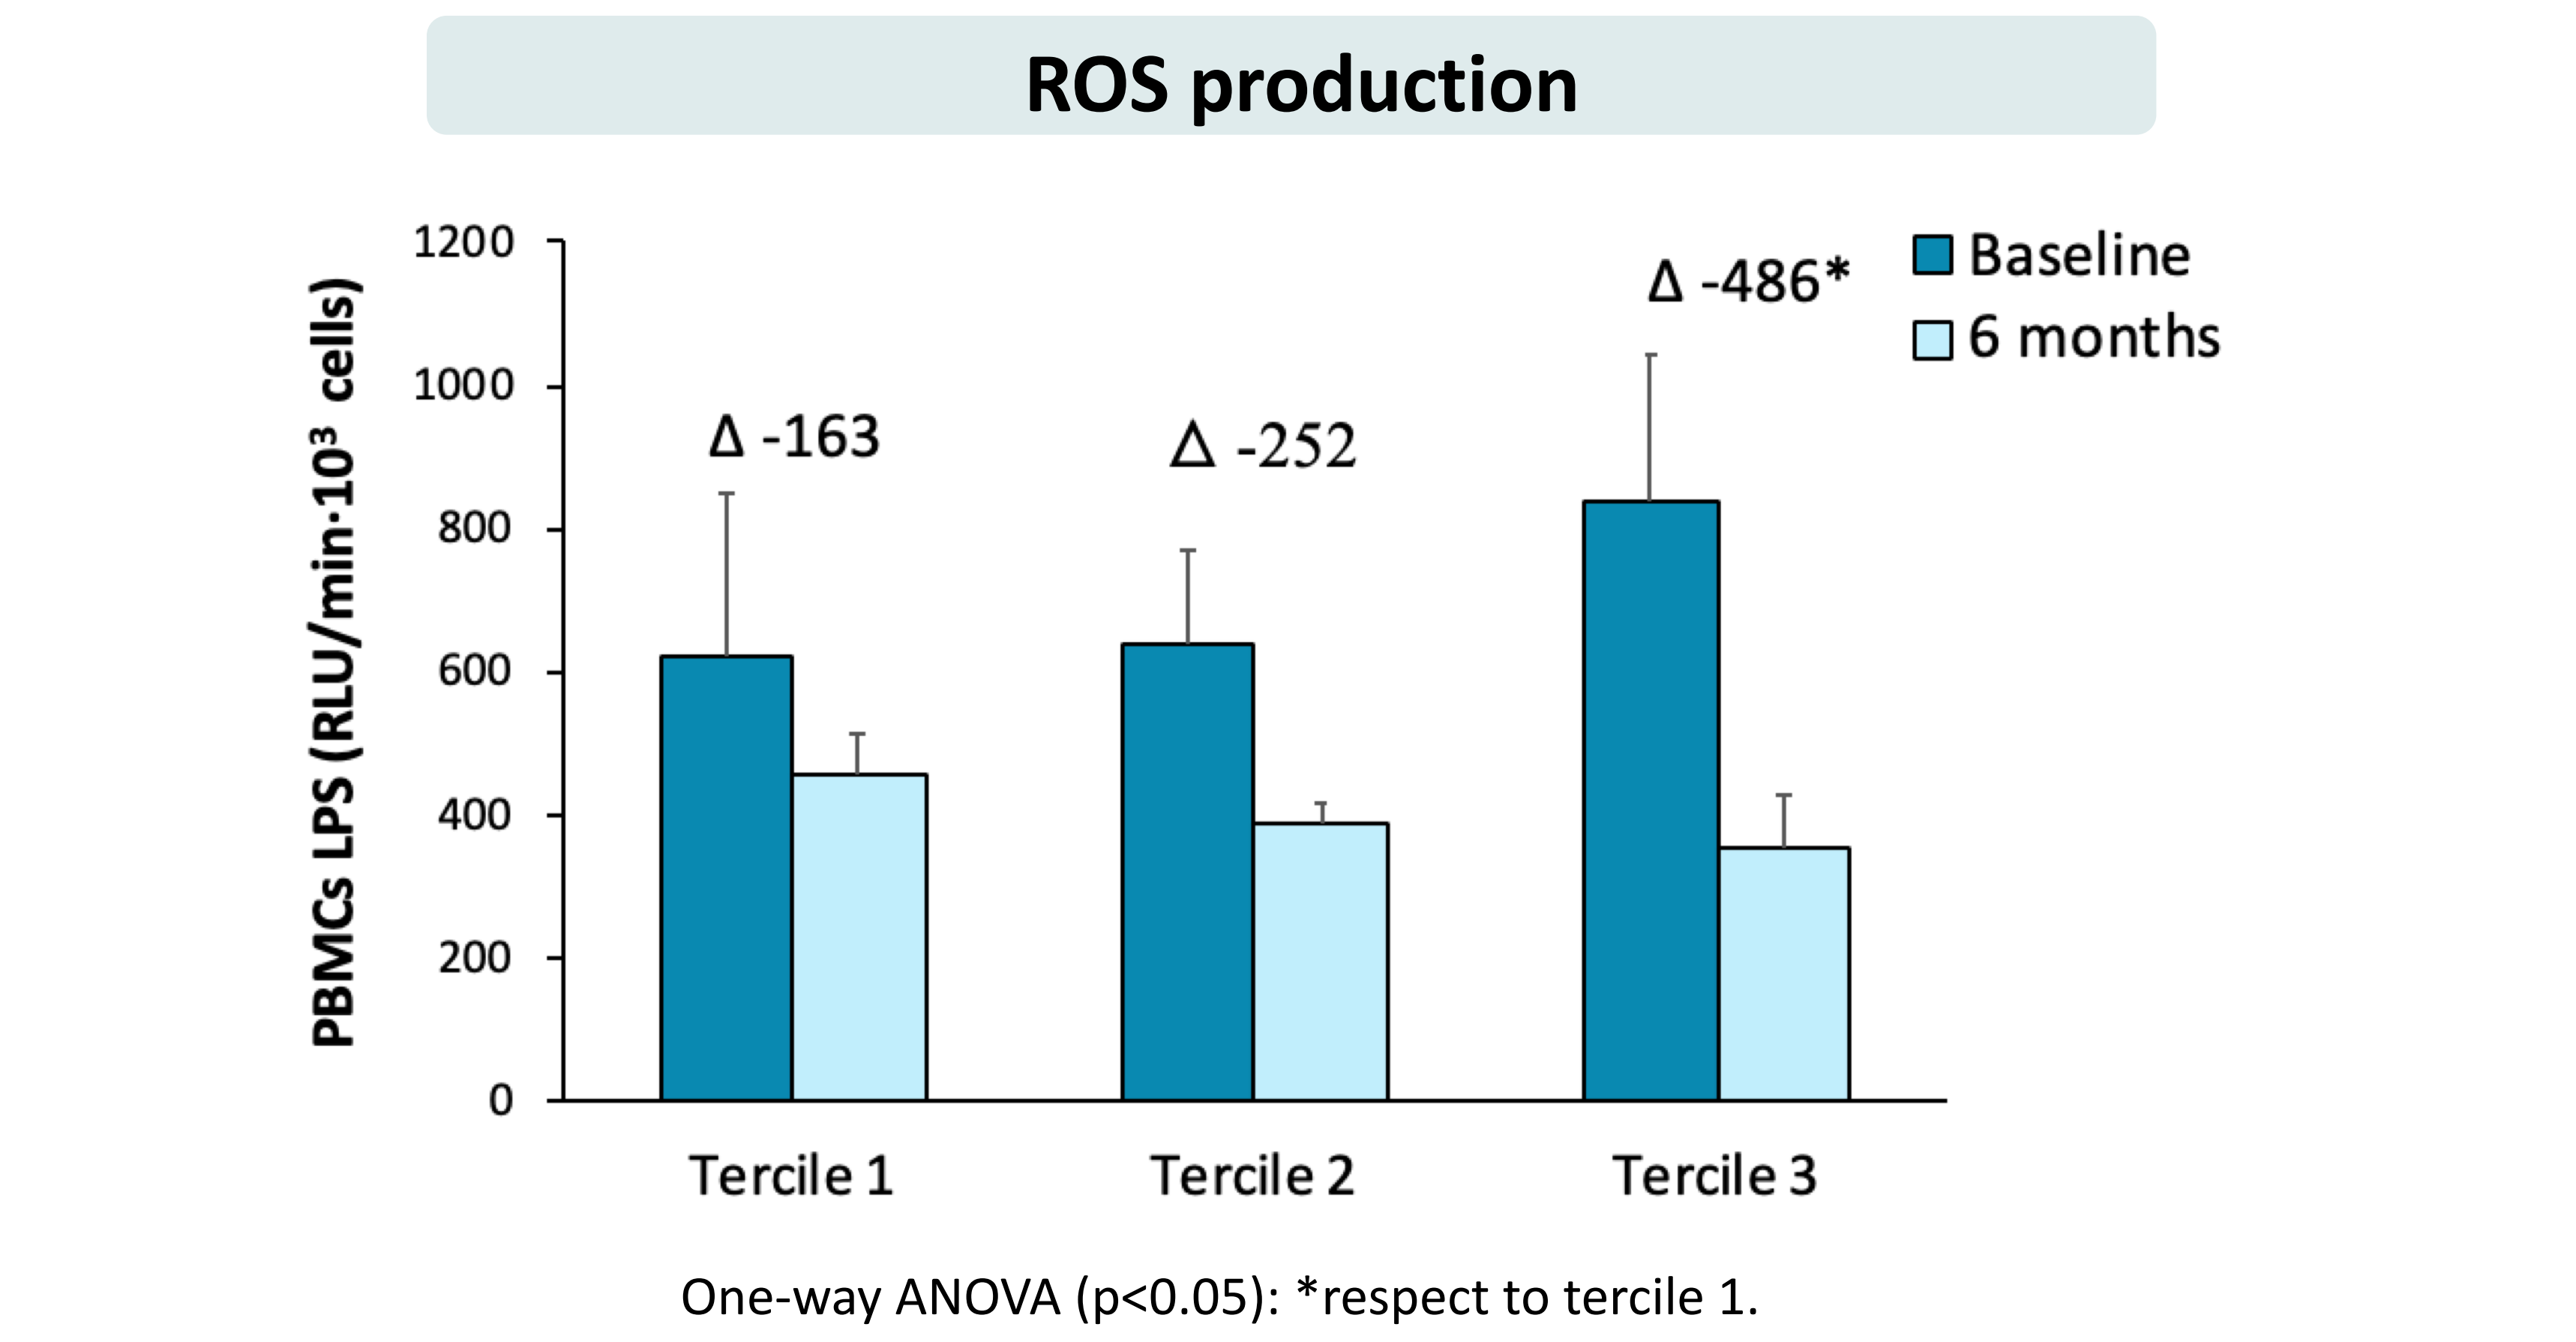

## RESULTS

The improvement in IFC levels was significantly higher in tertile 3 respect to tertiles 2 and 1. The greatest improvement in IFC is directly related to a better cardiorespiratory fitness determined with the Chester step test. Significant greater reductions in weight, Body Mass Index (BMI), alanine aminotransferase (ALT) and triglycerides were observed in tertile 3 respect to tertile 1 after 6 months of intervention. The improvement in catalase plasma activity and irisin and cytokeratin 18 levels were significantly higher in tertile 3 subjects, whereas no differences were observed in superoxide dismutase activity. Moreover, no significant differences were detected in glucose and cholesterol total levels. An improvement in ROS of PBMCs activated by LPS has been observant at 6 months of lifestyle intervention.

## REFERENCES

1. Finck, B.N. Diabetes 2018, 67, 2485–2493. PMID: 30459251
2. Ni Than, N.A.; Newsome B, P.N. 2015; Vol. 15; PMID: 25824073
3. Perdomo, C.M. et. al Nutrients 2019, 11. PMID: 30901929

| Characteristics of participants with NAFLD according to the improvement of intrahepatic fat content (IFC) |          |                          |                                |                        |       |
|-----------------------------------------------------------------------------------------------------------|----------|--------------------------|--------------------------------|------------------------|-------|
|                                                                                                           |          | Tercile 1<br>( < -0.567) | Tercile 2<br>(-0.567 to -7.13) | Tercile 3<br>(> -7.13) | ANOVA |
|                                                                                                           |          | N = 20                   | N = 20                         | N = 20                 |       |
| Weight (kg)                                                                                               | Baseline | 91.5 ± 3.51              | 97.8 ± 3.54                    | 93.9 ± 1.82            |       |
|                                                                                                           | 6 months | 90.4 ± 3.34              | 92.7 ± 2.89                    | 87.1 ± 1.91            |       |
|                                                                                                           | Δ        | -1.06 ± 0.751            | -5.08 ± 1.05*                  | -6.79 ± 1.13*          |       |
| BMI (kg/m²)                                                                                               | Baseline | 32.5 ± 0.737             | 34.4 ± 1.08                    | 34.0 ± 0.604           |       |
|                                                                                                           | 6 months | 32.2 ± 0.652             | 32.7 ± 0.978                   | 31.5 ± 0.512           |       |
|                                                                                                           | Δ        | -0.375 ± 0.262           | -1.71 ± 0.340*                 | -2.51 ± 0.419*         |       |
| ALT (U/L)                                                                                                 | Baseline | 27.9 ± 2.27              | 32.4 ± 4.13                    | 60.8 ± 13.5            |       |
|                                                                                                           | 6 months | 28.7 ± 2.66              | 24.0 ± 2.04                    | 29.8 ± 2.90            |       |
|                                                                                                           | Δ        | -0.800 ± 1.89            | -8.48 ± 3.37                   | -28.0 ± 11.4*          |       |
| Triglycerides (mg/dL)                                                                                     | Baseline | 178.3 ± 18.8             | 163.0 ± 12.8                   | 240.2 ± 31.4           |       |
|                                                                                                           | 6 months | 232.2 ± 36.8             | 128.1 ± 7.47                   | 159.4 ± 17.6           |       |
|                                                                                                           | Δ        | 53.8 ± 36.6              | -46.8 ± 7.82*                  | -80.8 ± 32.8*          |       |
| Glucose (mg/dL)                                                                                           | Baseline | 109.2 ± 5.26             | 116.1 ± 9.19                   | 115.1 ± 4.56           |       |
|                                                                                                           | 6 months | 110.1 ± 5.74             | 112.5 ± 9.54                   | 111.7 ± 9.16           |       |
|                                                                                                           | Δ        | 0.850 ± 3.99             | -2.76 ± 2.39                   | -3.40 ± 6.19           |       |
| HDL-cholesterol (mg/dL)                                                                                   | Baseline | 44.1 ± 2.74              | 42.2 ± 1.90                    | 39.6 ± 1.55            |       |
|                                                                                                           | 6 months | 44.7 ± 3.14              | 45.8 ± 2.38                    | 39.9 ± 1.30            |       |
|                                                                                                           | Δ        | 0.950 ± 1.47             | 4.24 ± 1.15                    | 0.250 ± 1.01           |       |

One-way ANOVA (p<0.05): \*respect to tertile 1.

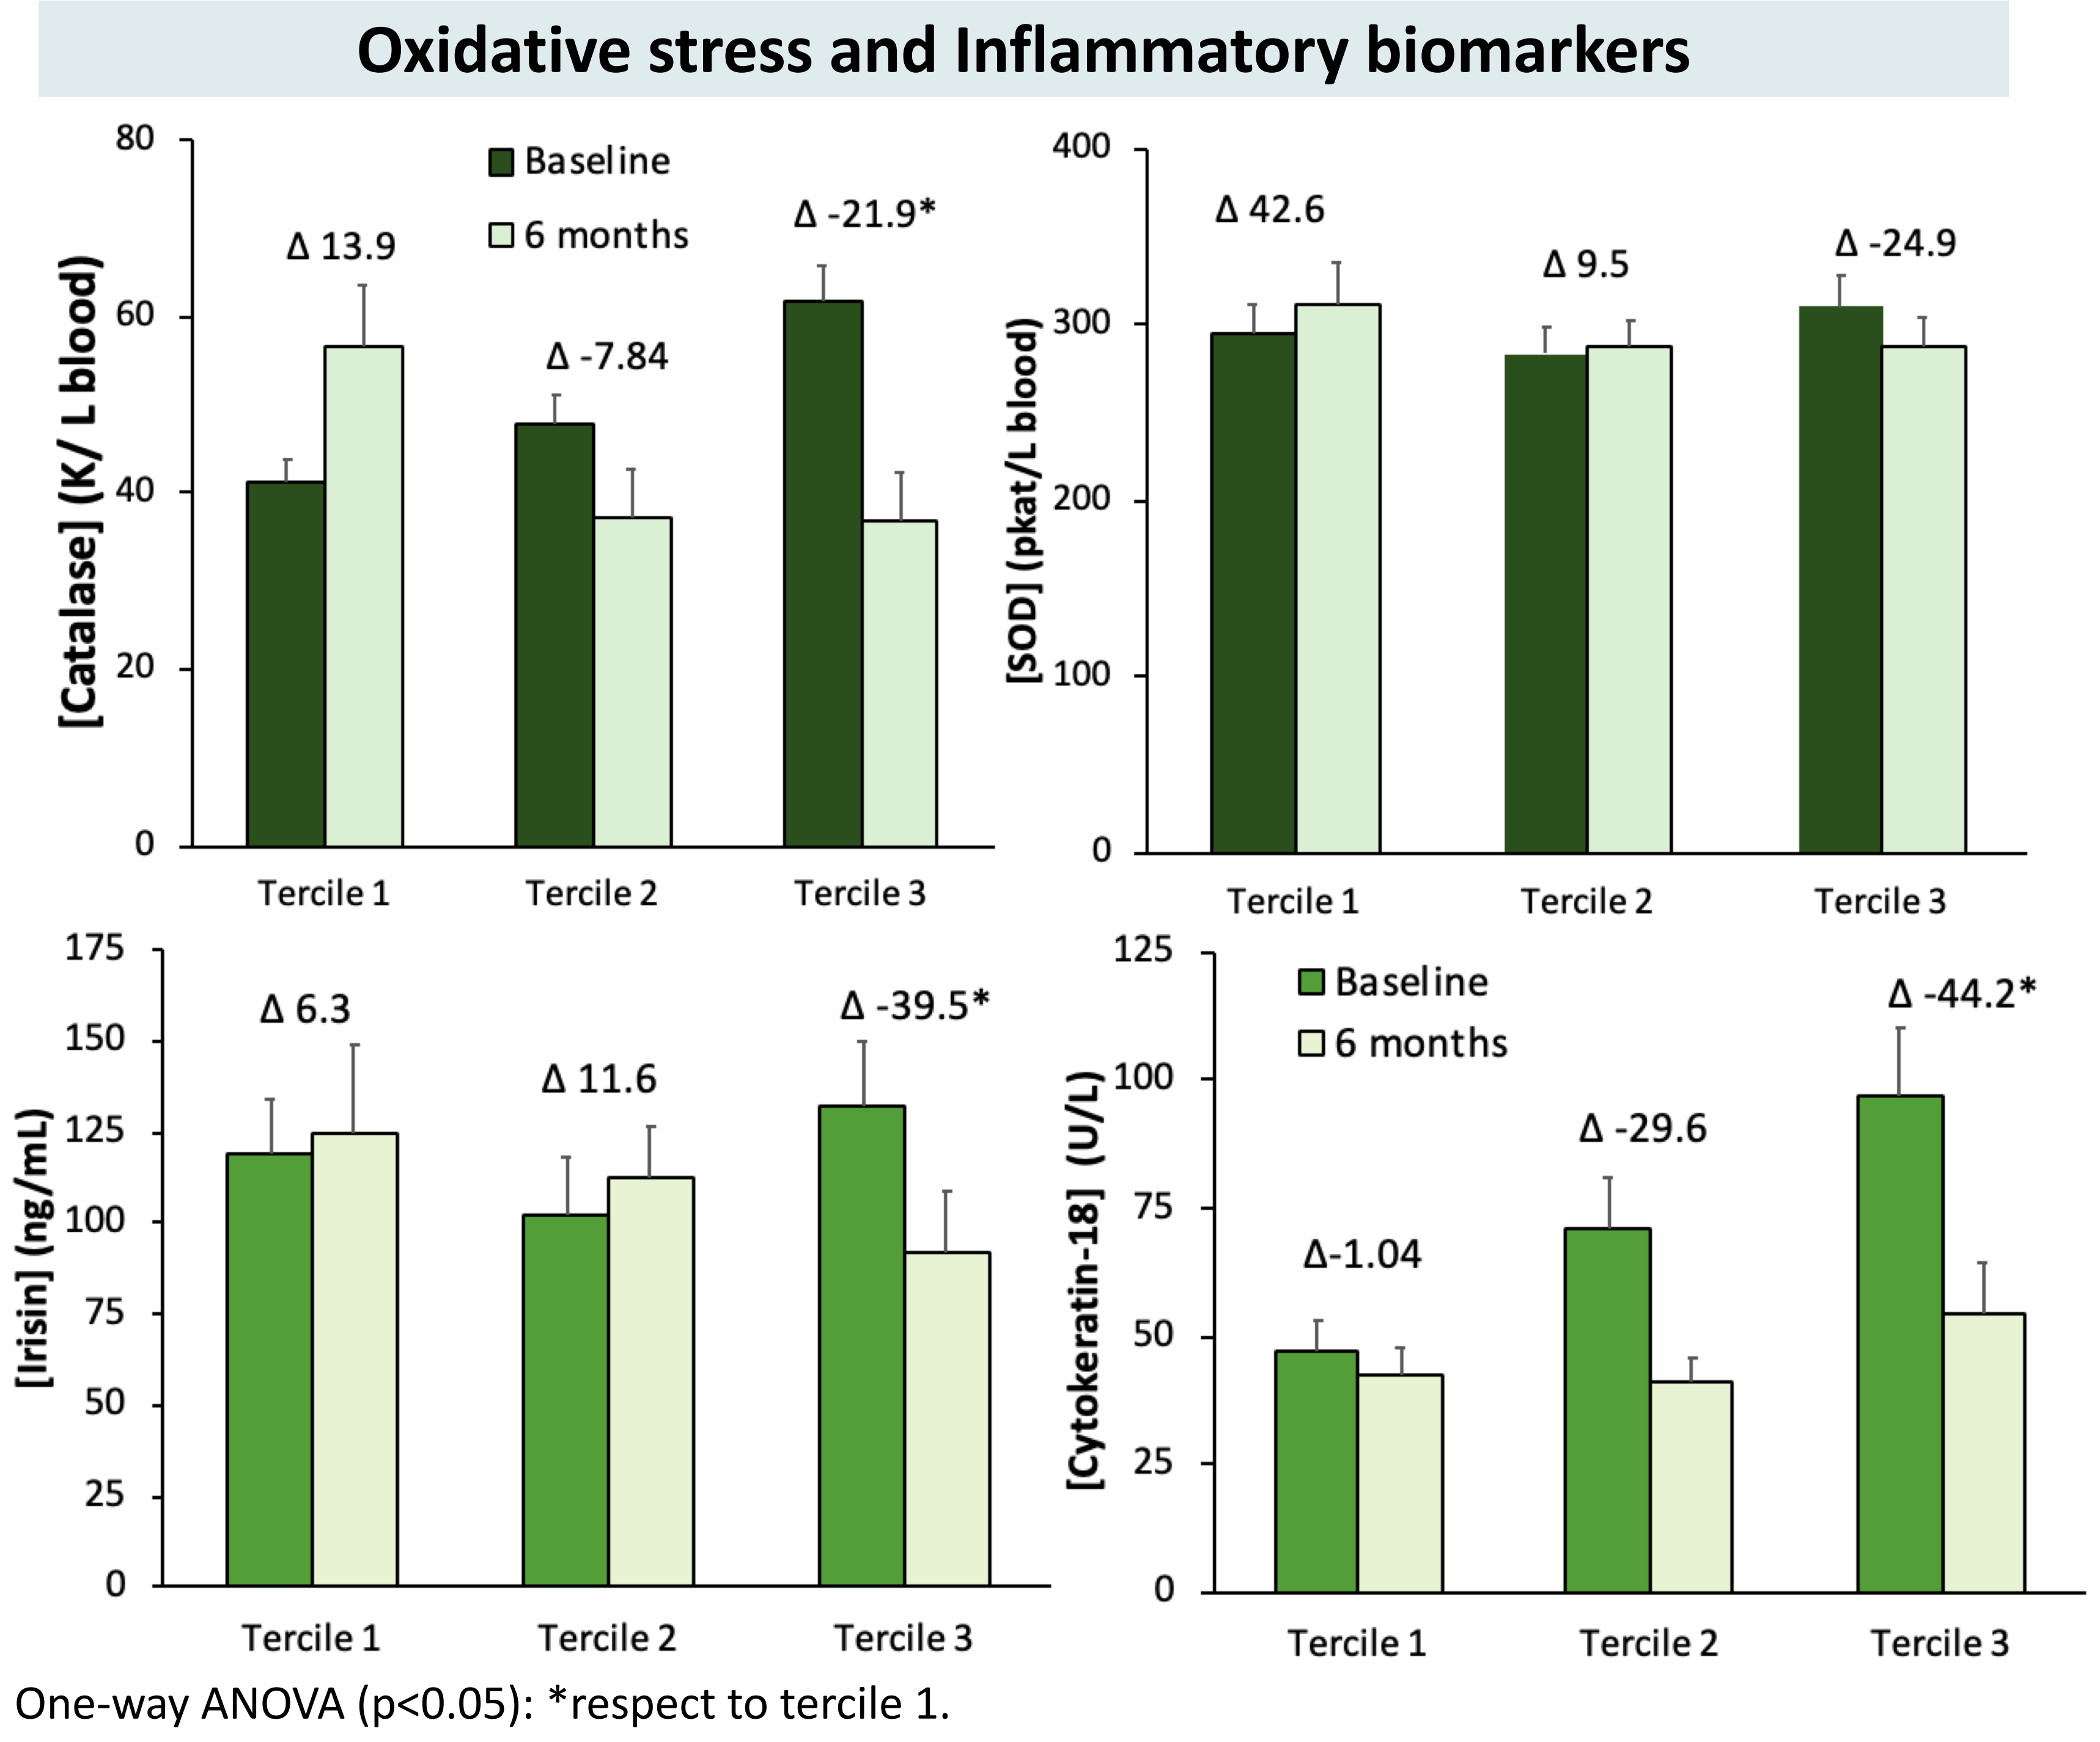

## CONCLUSION

The present data shows that the reduction of IFC is associated with an improvement in pro/antioxidant and pro-inflammatory status and a better cardiorespiratory fitness in NAFLD patients.

### Acknowledgments:

This study was supported by the Spanish Government, Institute of Health Carlos III (CIBEROBN CB12/03/30038) co-funded by the European Regional Development Fund, Fundació La Marató TV3 (201630.10), and EU-COST Action CA16112.

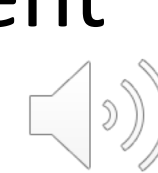

Supplement: s1 [file s1]
